# Supplementary material for: Clinician Willingness to Prescribe Medications for Opioid Use Disorder to Adolescents in Indiana
Source: PubMed Central journal article supplement (PMC11425143; doi:10.1001/jamanetworkopen.2024.35416), 2024-09-25
Supplement: jamanetwopen-e2435416-s001.pdf [file jamanetwopen-e2435416-s001.pdf]

## Supplemental Online Content

Aalsma MC, Bell LA, Schwartz K, et al. Clinician willingness to prescribe medications for opioid use disorder to adolescents in Indiana. *JAMA Netw Open*. 2024;7(9):e2435416.  
doi:10.1001/jamanetworkopen.2024.35416

**eTable.** Binary Logistic Regression Models

This supplemental material has been provided by the authors to give readers additional information about their work.

**eTable.** Binary Logistic Regression Models

|                                                                                         |                                  | Standard Model      |                        | SLX Model           |                        |
|-----------------------------------------------------------------------------------------|----------------------------------|---------------------|------------------------|---------------------|------------------------|
|                                                                                         |                                  | Estimate            | Probability Chi-square | Estimate            | Probability Chi-square |
| <b>Sociodemographic characteristics of clinician location and neighboring locations</b> |                                  |                     |                        |                     |                        |
| Total population                                                                        | Every 10,000 people increase     | 0.65<br>(0.50,0.86) | <0.001                 | 0.68<br>(0.50,0.92) | 0.01                   |
| Total population (W) <sup>a</sup>                                                       |                                  |                     |                        | 0.71<br>(0.51,0.97) | 0.03                   |
| % Black/AA                                                                              | Every percentage increase        | 0.98<br>(0.94,1.02) | 0.32                   | 1.03<br>(0.97,1.10) | 0.29                   |
| % Black/AA (W)                                                                          |                                  |                     |                        | 0.92<br>(0.87,0.99) | 0.02                   |
| % in poverty                                                                            | Every percentage increase        | 1.02<br>(0.96,1.07) | 0.54                   | 1.06<br>(1.00,1.13) | 0.06                   |
| % in poverty (W)                                                                        |                                  |                     |                        | 0.91<br>(0.82,1.00) | 0.05                   |
| Rurality <sup>b</sup>                                                                   | Every 1 point increase (1-10)    | 1.22<br>(1.08,1.38) | 0.002                  | 1.25<br>(1.01,1.54) | 0.04                   |
| Rurality (W)                                                                            |                                  |                     |                        | 0.97<br>(0.74,1.27) | 0.80                   |
| <b>Clinician characteristics</b>                                                        |                                  |                     |                        |                     |                        |
| Clinician credentials (MD/DO referent)                                                  | APC <sup>c</sup>                 | 0.82<br>(0.55,1.20) | 0.31                   |                     |                        |
| Clinician training (Family Medicine referent)                                           | Addiction Medicine or Psychiatry | 1.12<br>(0.70,1.79) | 0.63                   |                     |                        |
|                                                                                         | Other <sup>d</sup>               | 0.45<br>(0.25,0.81) | 0.008                  |                     |                        |

<sup>a</sup> W = spatially-lagged variable, generated through by spatial weight matrices

<sup>b</sup> Rurality is described with Rural Urban Commuting Area, version 2 (RUCA2) codes, an index from 1-10 in which higher scores indicate a location is more rural<sup>32</sup>

<sup>c</sup> Advanced Practice Clinician (i.e., nurse practitioner, physician's assistant)

<sup>d</sup> Other = Clinician had training in any category other than addiction medicine, psychiatry, or family medicine
