# Supplementary material for: Clinician Willingness to Prescribe Medications for Opioid Use Disorder to Adolescents in Indiana
Source: PubMed Central journal article supplement (PMC11425143; doi:10.1001/jamanetworkopen.2024.35416), 2024-09-25
Supplement: jamanetwopen-e2435416-s002.pdf [file jamanetwopen-e2435416-s002.pdf]

## Data Sharing Statement

### Data

**Data available:** Yes

**Data types:** Deidentified participant data, Data (not involving human participants)

**How to access data:** [maalsma@iu.edu](mailto:maalsma@iu.edu)

**When available:** With publication

### Supporting Documents

**Document types:** Statistical/analytic code

**How to access documents:** [maalsma@iu.edu](mailto:maalsma@iu.edu)

**When available:** With publication

### Additional Information

**Who can access the data:** researchers whose use of data is approved

**Types of analyses:** for validation purposes

**Mechanisms of data availability:** signed data access agreement
